# Supplementary material for: Crystallin-αB as a stress marker in lens epithelial cells
Source: Research Square preprint supplement (doi:10.21203/rs.3.rs-6940731/v1), 2025-06-30
Supplement: Supplementary file 1 [file 02be59688e0752aa2fb7986b.docx]

**Supplementary Material**

| Compared signals | | PCC | pPCC | SRCC | pSRCC |
| --- | --- | --- | --- | --- | --- |
| Pixelwise | DAPI vs CRYAB | -0.231 (0.138) | 6.0 10-25 | -0.317 (0.118) | 5.5 10-30 |
| DAPI vs CRYBB2 | -0.314 (0.151) | 3.4 10-24 | -0.322 (0.142) | 4.7 10-26 |
| CRYAB vs CRYBB2 | 0.542 (0.139) | 4.0 10-39 | 0.673 (0.110) | 7.7 10-51 |
| CRYAB vs CRYBB2 cooccurrence region | 0.407 (0.187) | 3.3 10-25 | - | - |
| CRYAB vs CRYBB2 cytoplasm | 0.501 (0.159) | 7.5 10-34 | 0.603 (0.155) | 3.9 10-39 |
| CRYAB vs CRYBB2 nucleoplasm | 0.554 (0.145) | 9.2 10-39 | 0.648 (0.140) | 1.3 10-43 |
| Compartment based | CRYAB vs CRYBB2 all compartments | 0.650 (0.149) | 4.3 10-42 | 0.805 (0.080) | 3.8 10-64 |
| CRYAB vs CRYBB2 cytoplasm | 0.568 (0.192) | 1.9 10-32 | 0.688 (0.166) | 8.9 10-41 |
| CRYAB vs CRYBB2 nucleoplasm | 0.646 (0.157) | 1.3 10-40 | 0.748 (0.156) | 1.5 10-44 |
| CRYAB cytoplasm vs nucleoplasm | 0.814 (0.069) | 3.1 10-68 | 0.847 (0.093) | 2.6 10-61 |
| CRYBB2 cytoplasm vs nucleoplasm | 0.749 (0.246) | 4.5 10-33 | 0.828 (0.167) | 1.1 10-45 |
| CRYAB cytoplasm vs CRYBB2 nucleoplasm | 0.649 (0.146) | 1.5 10-42 | 0.745 (0.136) | 5.3 10-48 |
| CRYAB nucleoplasm vs CRYBB2 cytoplasm | 0.499 (0.195) | 6.6 10-29 | 0.623 (0.178) | 1.8 10-36 |
| CRYAB cytoplasm vs CRYBB2 nuclear fraction | 0.465 (0.178) | 2.6 10-29 | 0.577 (0.208) | 1.5 10-30 |

**Supplementary Table 1**. Correlation coefficients between pixel-wise and compartment-based signals. Mean (SD) over 63 samples.

| Antibody | Company | Reference |
| --- | --- | --- |
| CRYBB2 | Merck | HPA043749 |
| CRAB | Abcam | Ab13496 |
| Goat Alexa Fluor 488 anti-Rabbit | Invitrogen | A11034 |
| Goat Alexa Fluor 568 anti-Mouse | Invitrogen | A11004 |

**Supplementary Table 2**. Antibody description.
